# Supplementary material for: Exosomal miR-4644 targets SPRY3 to promote proliferation and invasion of pancreatic cancer
Source: Research Square preprint supplement (doi:10.21203/rs.3.rs-8338211/v1), 2026-01-05
Supplement: Supplementary file 1 [file 153d6472f50c1aeb690addf0.xlsx]

## Sheet: CCK8
	AsPC-1																		BxPC-3
NC						miR-4644													NC					miR-4644
0.7838	0.8114	0.7341	0.7652	0.7319	0.7281	1.0426	1.0296	1.0226	1.0209	0.9502	1.0403								0.5871	0.5709	0.525	0.5278	0.5165	0.6838	0.6626	0.6794	0.66	0.6717
1.1946	1.2439	1.1809	1.1409	1.2344	1.1767	1.8804	1.7516	1.6594	1.6284	1.6133	1.4463								0.8597	0.8125	0.7903	0.8011	0.7872	0.8564	0.8951	0.9201	0.8887	0.8701
1.4389	1.6061	1.5253	1.4336	1.424	1.4003	1.9335	2.0349	1.8656	1.8233	1.7567	1.7639								0.8743	0.8304	0.8627	0.8678	0.8686	1.0753	0.8766	0.8925	0.9787	0.98
Ctrl						Exo (A)+NCi						Exo (A)+miR-4644i							Ctrl			Exo (B)+NCi			Exo (B)+miR-4644i
0.4631	0.399	0.3334	0.3237	0.3842	0.3944	0.919	0.623	0.8565	0.7532	0.846	0.6946	0.6031	0.5995	0.5482	0.5035	0.4853	0.4199		0.3306	0.351	0.3345	0.598	0.4862	0.4944	0.3675	0.3219	0.3757
0.6864	0.6947	0.6708	0.6368	0.6617	0.6197	1.1697	1.0825	1.1459	1.1771	1.0996	1.119	0.752	0.7948	0.7579	0.7302	0.7806	0.6971		0.4627	0.4434	0.4141	0.6969	0.6784	0.6461	0.5919	0.5802	0.5836
0.9873	0.936	0.8659	0.7934	0.8379	0.8021	1.3688	1.3137	1.3049	1.2633	1.2606	1.207	1.0285	0.9545	1.0152	0.8651	0.8884	0.8628		0.5676	0.5211	0.5489	0.9909	0.8454	0.8199	0.6378	0.6533	0.6413
Ctrl			Exo (A)																Ctrl					Exo (B)
0.646	0.5543	0.646	0.829	0.7635	0.8231														0.3909	0.3929	0.4081	0.4235	0.4189	0.5474	0.5702	0.5797	0.5922	0.5899
1.1507	1.1312	1.1137	1.3069	1.4046	1.4009														0.8832	0.8103	0.7384	0.7422	0.7239	1.1306	1.0093	1.0232	0.9639	0.9881
1.5863	1.6091	1.506	1.7753	1.8352	1.8763														1.0373	1.0556	1.0591	0.9379	0.9706	1.2841	1.4606	1.4214	1.3199	1.2712
																			NC-B			OE			OE+miR-4644
NC-A			OE			OE+miR-4644													0.5966	0.56	0.5579	0.5075	0.4861	0.4704	0.5749	0.5815	0.5705
0.87	0.8351	0.8142	0.6461	0.6754	0.6478	1.0061	0.8967	0.8988											0.8045	0.7663	0.7741	0.761	0.7063	0.7436	1.0354	1.1113	1.0111
1.2275	1.2819	1.2698	1.0331	1.0177	0.9566	1.3418	1.3409	1.2491											1.2536	1.1916	1.247	1.0225	0.9972	0.9726	1.3727	1.2554	1.267
1.8727	1.9492	1.7826	1.5517	1.4545	1.4188	1.834	1.7145	1.7287
																			Ctrl-B			NC			NCi
Ctrl-A			NC			NCi													0.3198	0.3153	0.3115	0.3559	0.3501	0.3621	0.3344	0.3429	0.3392
2.053	2.108	2.116	2.085	2.16	2.151	1.929	2.053	2.004											0.5564	0.5912	0.5281	0.6357	0.6521	0.6872	0.6473	0.6491	0.6693
2.432	2.44	2.464	2.226	2.264	2.326	2.32	2.369	2.355											0.788	0.716	0.7199	0.6848	0.6791	0.7724	0.7153	0.7557	0.7155
3.213	3.316	3.422	3.23	3.398	3.437	3.147	3.251	3.254
																			NCi-B						miR-4644i
NCi					miR-4644i														0.23	0.21	0.22	0.19	0.2	0.195	0.23	0.21	0.22	0.19	0.2	0.195
1.0049	1.0492	1.0257	0.9414	0.9862	0.9527	0.927	0.9586	0.9267	0.9317										0.827	0.8272	0.8121	0.8344	0.841	0.8297	0.4846	0.516	0.5079	0.4837	0.4911	0.4674
1.7664	1.7173	1.5018	1.4986	1.3962	1.5261	1.458	1.2562	1.4271	1.2795										1.172	1.2276	1.2139	1.2545	1.2098	1.1029	0.8132	0.9347	0.9497	0.9025	0.8968	0.8526
1.9527	2.0028	1.802	1.874	1.8081	1.749	1.7432	1.6602	1.6027	1.6777

## Sheet: Plate Coloy
Ctrl	Exo (A)		NC	miR-4644		NCi	miR-4644i		Ctrl	Exo (A)+NCi	Exo (A)+miR-4644i		NC	OE	OE+miR-4644		Ctrl	NC	NCi
35	70		112	140		124	64		42	72	46		153	51	104		43	37	34
28	50		116	171		110	67		41	68	58		170	60	101		39	33	38
34	54		125	156		100	70		38	61	42		160	44	104		40	49	42
Ctrl	Exo (B)		NC	miR-4664		NCi	miR-4644i		Ctrl	Exo (B)+NCi	Exo (B)+miR-4644i		NC	OE	OE+miR-4644		Ctrl	NC	NCi
12	40		14	37		52	20		17	32	17		82	42	60		98	110	113
25	49		20	46		66	13		16	36	22		62	50	66		100	90	106
24	68		17	42		59	16		14	45	17		79	45	69		90	104	113

## Sheet: Migration
Ctrl	Exo (A)		NC	miR-4644		NCi	miR-4644i		NC	OE	OE+miR-4644		Ctrl	Exo (A)+NCi	Exo (A)+miR-4644i		Ctrl	NC	NCi
114	162		62	138		106	91		165	98	130		106	202	171		98	91	111
95	216		69	154		117	93		155	106	142		128	226	170		94	93	101
148	191		71	116		134	89		150	110	150		122	190	158		106	97	105
Ctrl	Exo (B)		NC	miR-4644		NCi	miR-4644i		NC-B	OE	OE+miR-4644		Ctrl	Exo (B)+NCi	Exo (B)+miR-4644i		Ctrl	NC	NCi
137	404		49	67		73	32		109	15	57		16	179	49		21	24	30
160	450		53	58		98	17		116	18	57		24	175	49		29	26	27
163	440		44	62		64	22		110	15	41		26	191	50		21	24	33

## Sheet: Invasion
Ctrl	Exo (A)		NC	miR-4644		NCi	miR-4644i		NC-A	OE	OE+miR-4644		Ctrl	Exo (A)+NCi	Exo (A)+miR-4644i		Ctrl	NC	NCi
64	98		51	137		94	50		93	67	90		43	129	93		76	61	67
93	131		54	150		96	48		84	60	87		38	143	99		67	69	62
78	130		76	173		80	37		87	69	83		32	123	93		51	57	66
Ctrl	Exo (B)		NC	miR-4644		NCi	miR-4644i		NC-B	OE	OE+miR-4644		Ctrl	Exo (B)+NCi	Exo (B)+miR-4644i		Ctrl	NC	NCi
30	85		7	15		21	9		90	10	37		15	92	37		39	34	36
28	76		10	16		22	7		85	7	33		14	89	33		32	44	32
33	94		13	18		24	8		84	10	34		15	108	40		30	35	30

## Sheet: Flow Cytomy
NC	OE	OE+miR-4644		Ctrl	NCi	miR-4644i		Ctrl	NC	miR-4644		Ctrl	Exo (A)+NCi	Exo (A)+miR-4644i
13.8	22.6	11.5		20.4	19.7	48.1		75.5	75.5	19.7		34.8	7	25.7
13.4	22.3	11.8		19.7	19.4	47.2		75	75.1	20		33.4	7.39	24.8
13.9	22.9	11.7		20.1	20.3	47.6		76	75.2	19.3		33	7.76	24.9
NC	OE	OE+miR-4644		Ctrl	NCi	miR-4644i		Ctrl	NC	miR-4644		Ctrl	Exo (B)+NCi	Exo (B)+miR-4644i
4.71	29.1	14.6		27.9	25.3	43		22.8	23	16.6		34.1	15.1	33.4
4.5	29.2	13.8		26.7	25.8	42.1		25	22.8	15.8		33.4	15	32.5
4.05	31.1	16.8		27.3	26.4	41		23	23	15.6		34.6	17.4	33.3

## Sheet: qRT-PCR
hTERT-HPNE	AsPC-1	BxPC-3		NC-B	OE		NC-B	A			NC			miR-4644
1.10509	3.45122	0.632554		1.10735	1.48067		0.866703	1.90237		AsPC-1	0.906949	1.1312	0.961853	242647	267822	337131
0.928977	3.00071	0.4535		1.11423	1.41106		0.882443	1.7818		BxPC-3	1.14426	0.95661	0.89913	224608	207124	206591
0.965934	3.03318	0.470621		0.778421	1.3258		1.25085	2.14497			NCi			miR-4644i
										AsPC-1	1.01934	0.969311	1.01135	0.516373	0.559256	0.645078
										BxPC-3	1.12555	0.940969	0.884429	0.0983	0.079893	0.062666
Ctrl	Exo (B)+NCi	Exo (B)+miR-4644i	NC	miR-4644		Ctrl	NCi	miR-4644i
1.09757	0.582249	21.7791	1.15195	0.427702		1.09757	1.19351	1.38487		Luci	NC			miR-4644
0.869115	0.791832	21.7233	1.13361	0.64267		0.869115	1.08835	1.64862		WT	1.11455	0.845201	1.04025	0.360086	0.572136	0.577915
1.03332	0.806672	11.4344	0.921706	0.635282		1.03332	0.718135	1.45074		MT	0.931034	0.862069	1.2069	0.884615	0.817308	0.897436
										Cellular				Exosomal
Ctrl	Exo (A)+NCi	Exo (A)+miR-4644i	NC	miR-4644		Ctrl	NCi	miR-4644i		hTERT-HPNE	AsPC-1	BxPC-3		Exo (H)	Exo (A)	Exo (B)
1.02759	0.098434	1.59323	0.993329	0.271432		1.02759	1.03782	2.06262		0.996944	1.46445	0.477827		1.02304	0.337719	15.9069
0.76426	0.087695	1.50104	0.967403	0.215597		0.76426	0.919556	2.50615		1.00771	2.01577	0.54837		0.877436	0.83395	32.623
1.20815	0.085557	2.90781	1.03927	0.259356		1.20815	1.04262	2.30989		0.995342	2.1138	0.620246		1.09953	0.444692	16.8844
	Tumor			Para-tumor
1	1.04553	0.950563	0.998722	0.989396	1.02089	0.843602
2	1.0705	1.02274	0.886494	0.984455	1.36163	1.17221
3	1.28677	0.886108	0.470239	1.17581	1.55927	1.08572
4	0.882969	1.17572	0.867765	1.04276	1.10039	1.22191
5	0.954525	0.941795	1.08808	0.941346	1.10127	0.747088
6	0.716047	1.12037	1.06466	0.461257	0.976244	0.9141
7	0.79962	1.24781	0.778331	0.359423	0.97991	0.39149
8	0.950787	1.08866	0.944809	0.942285	0.944543	0.868316
9	0.81835	0.933715	1.17125	0.599067	0.770282	0.515935
10	0.81504	1.14821	0.97317	0.124613	0.500026	0.323375
11	0.98163	1.0769	0.928245	2.02174	1.37797	1.28053
12	0.833287	1.04109	1.0862	1.27551	1.35387	1.23914
13	0.990148	1.01197	0.997599	0.988516	0.832836	0.463612
14	0.724269	1.32815	0.532894	0.301177	0.356049	0.410041
15	0.516187	1.29547	0.843356	1.16497	1.82909	0.931815
16	0.9095	1.08089	0.992718	0.883676	0.913591	0.845941
17	1.0361	1.02052	0.936984	0.927915	0.755035	0.866415
18	0.660916	1.32071	0.652468	0.765149	1.10615	1.22494
19	0.93662	1.17897	0.796438	0.762026	1.01515	0.477287
20	0.952715	1.06616	0.972481	1.05526	1.17477	1.15742
21	1.01279	1.00067	0.986133	0.511903	0.148244	0.177927
22	0.798978	0.946783	1.17198	0.594696	0.670392	0.858308
23	1.18655	0.929667	0.787437	0.262614	0.416613	0.490315
24	0.960304	1.03027	1.00653	0.762782	0.714337	0.666009
25	1.074	0.939998	0.974638	0.648706	0.814153	0.727829
26	0.760965	1.2158	0.891913	0.831605	0.743257	0.803684
27	1.125	1.04269	0.750655	0.309881	0.460741	0.463608
28	1.03903	0.975331	0.982809	1.21841	1.29851	1.20926
29	1.0429	0.94593	1.00571	0.890533	0.573208	0.953037
30	0.940053	0.943835	1.09699	0.340787	0.913224	1.04518
31	0.907268	1.05004	1.02944	0.664879	0.631777	0.597805
32	1.02966	0.897915	1.05644	1.06158	1.0112	1.01991

## Sheet: Animal experiment
		Ki67
	AsPC-1	NC	OE	OE+miR-4644	BxPC-3	NC	OE	OE+miR-4644
		10.611	3.464	5.475		8.167	5.948	7.252
		9.803	4.056	5.339		9.004	4.977	6.919
		10.217	4.615	4.916		9.144	4.615	7.082
		Body Weight
		NC	OE	OE+miR-4644		NC	OE	OE+miR-4644
		24.5	23	24.5		22.7	22.6	18.7
		21.6	22.3	21.6		21.3	22.6	22.6
		21.7	21.6	22.7		25.9	22.3	21.5
		24.3	20	21.5		26.1	22.5	21.3
		22.8	21.1	18		23.2	23.1	22.6
		Tumor Weight
		NC	OE	OE+miR-4644		NC	OE	OE+miR-4644
		0.4373	0.2205	0.3579		0.3268	0.1669	0.239
		0.6722	0.1432	0.229		0.31755	0.139	0.2762
		0.4104	0.2211	0.232		0.2829	0.1378	0.2562
		0.5695	0.149	0.3299		0.2936	0.1505	0.2167
		0.397	0.079	0.2455		0.2898	0.1438	0.2179
		SPRY3
		NC	OE	OE+miR-4644		NC	OE	OE+miR-4644
		1.407	7.96	5.189		1.253	10.787	6.026
		1.481	7.162	5.536		1.413	8.129	6.012
		1.39	9.912	5.297		1.554	9.912	6.587

## Sheet: Survival Analysis
	Days	High	Low
1	1016
2	736
3	883
4	1102	1
5	313	1
6	1184	1
7		0
8	1146	1
9	1271	1
10	228	1
11	404	1
12	1153	1
13	82	1
14	628	1
15	448	1
16	128	1
17	549	1
18	526	1
19	209	1
20	688	1
21	669	1
22	548	1
23	272		1
24	1012		1
25	389		1
26	995		1
27	669		1
28	570		1
29	709		1
30	844		1
31	72		1
32	733		1
