# Supplementary figures and images for: Exosomal miR-4644 targets SPRY3 to promote proliferation and invasion of pancreatic cancer
Source: Research Square preprint supplement (doi:10.21203/rs.3.rs-8338211/v1), 2026-01-05

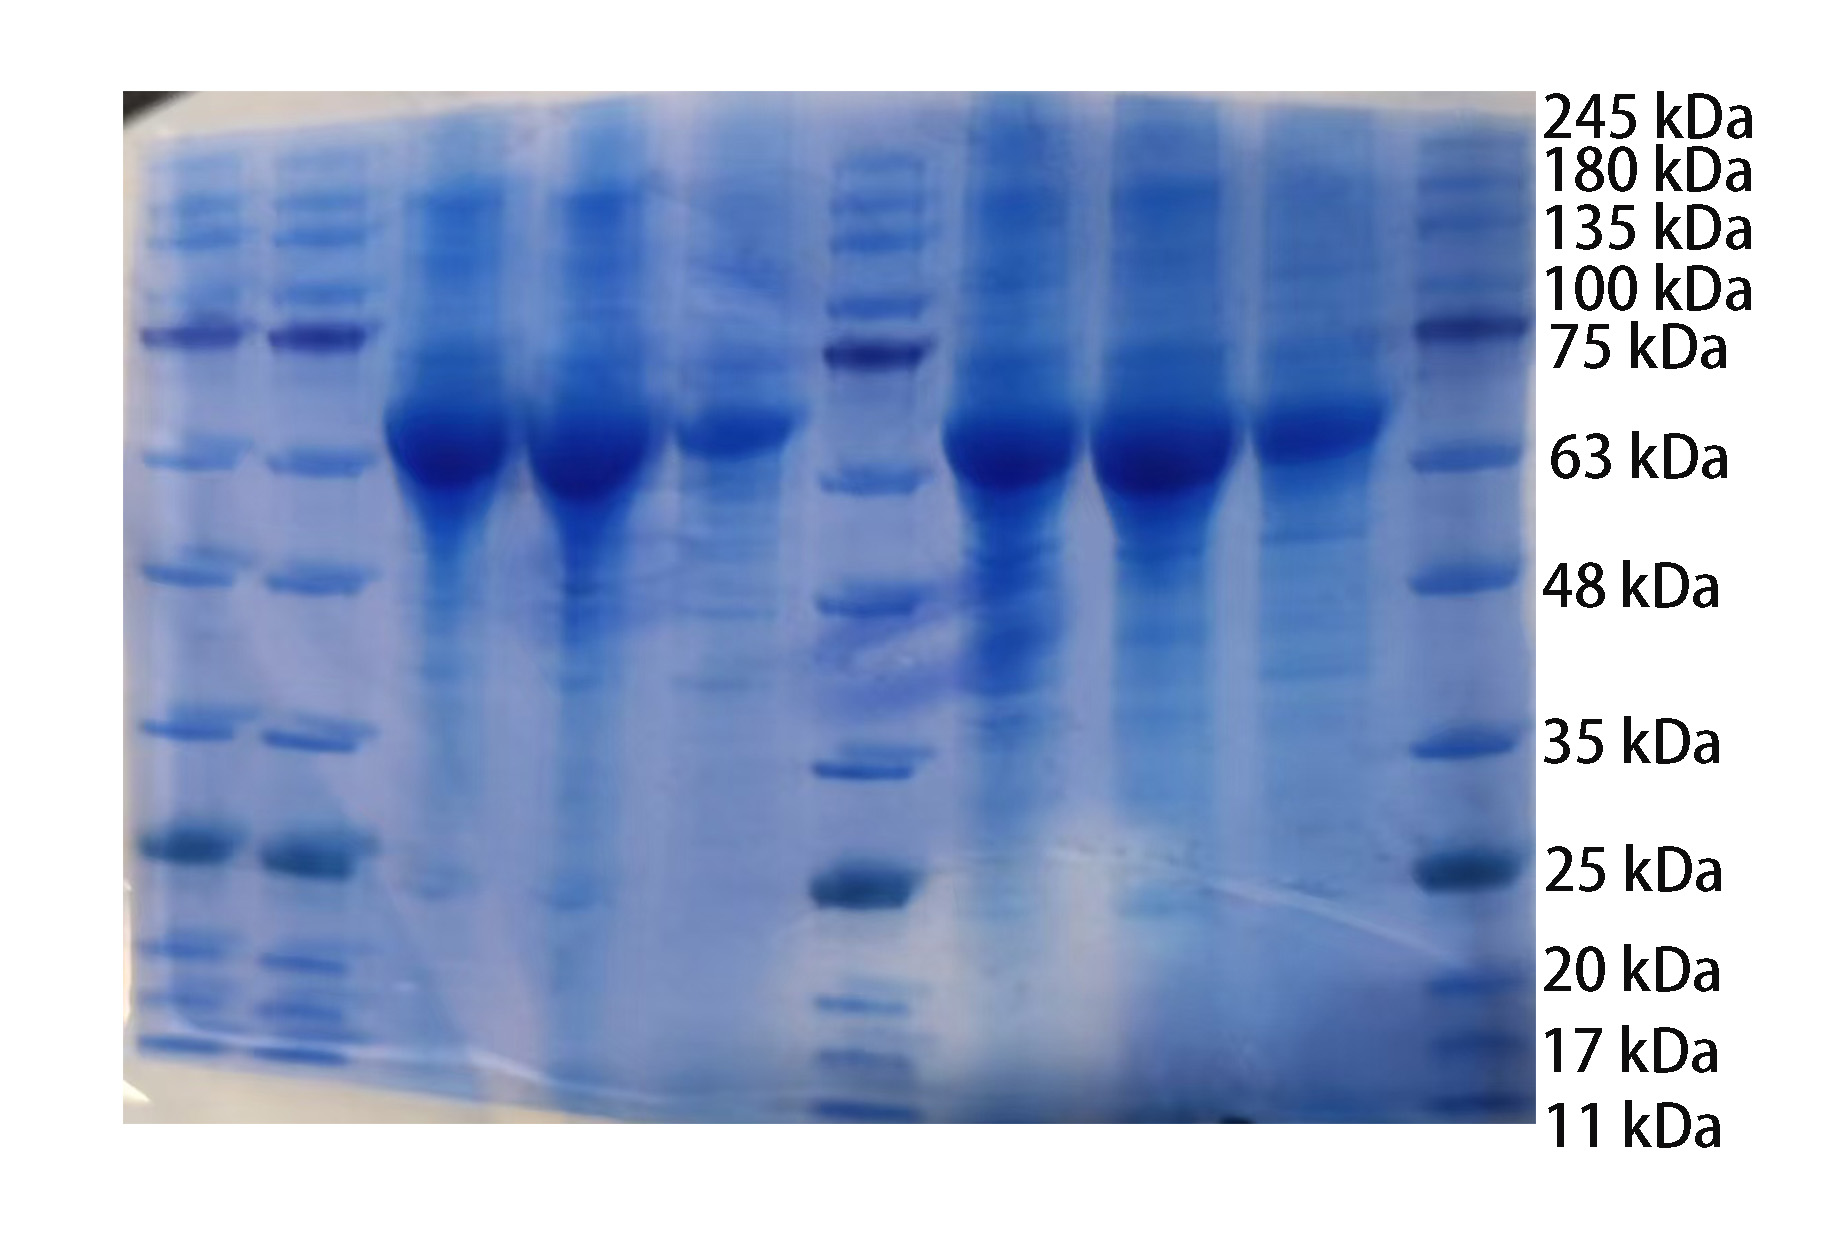

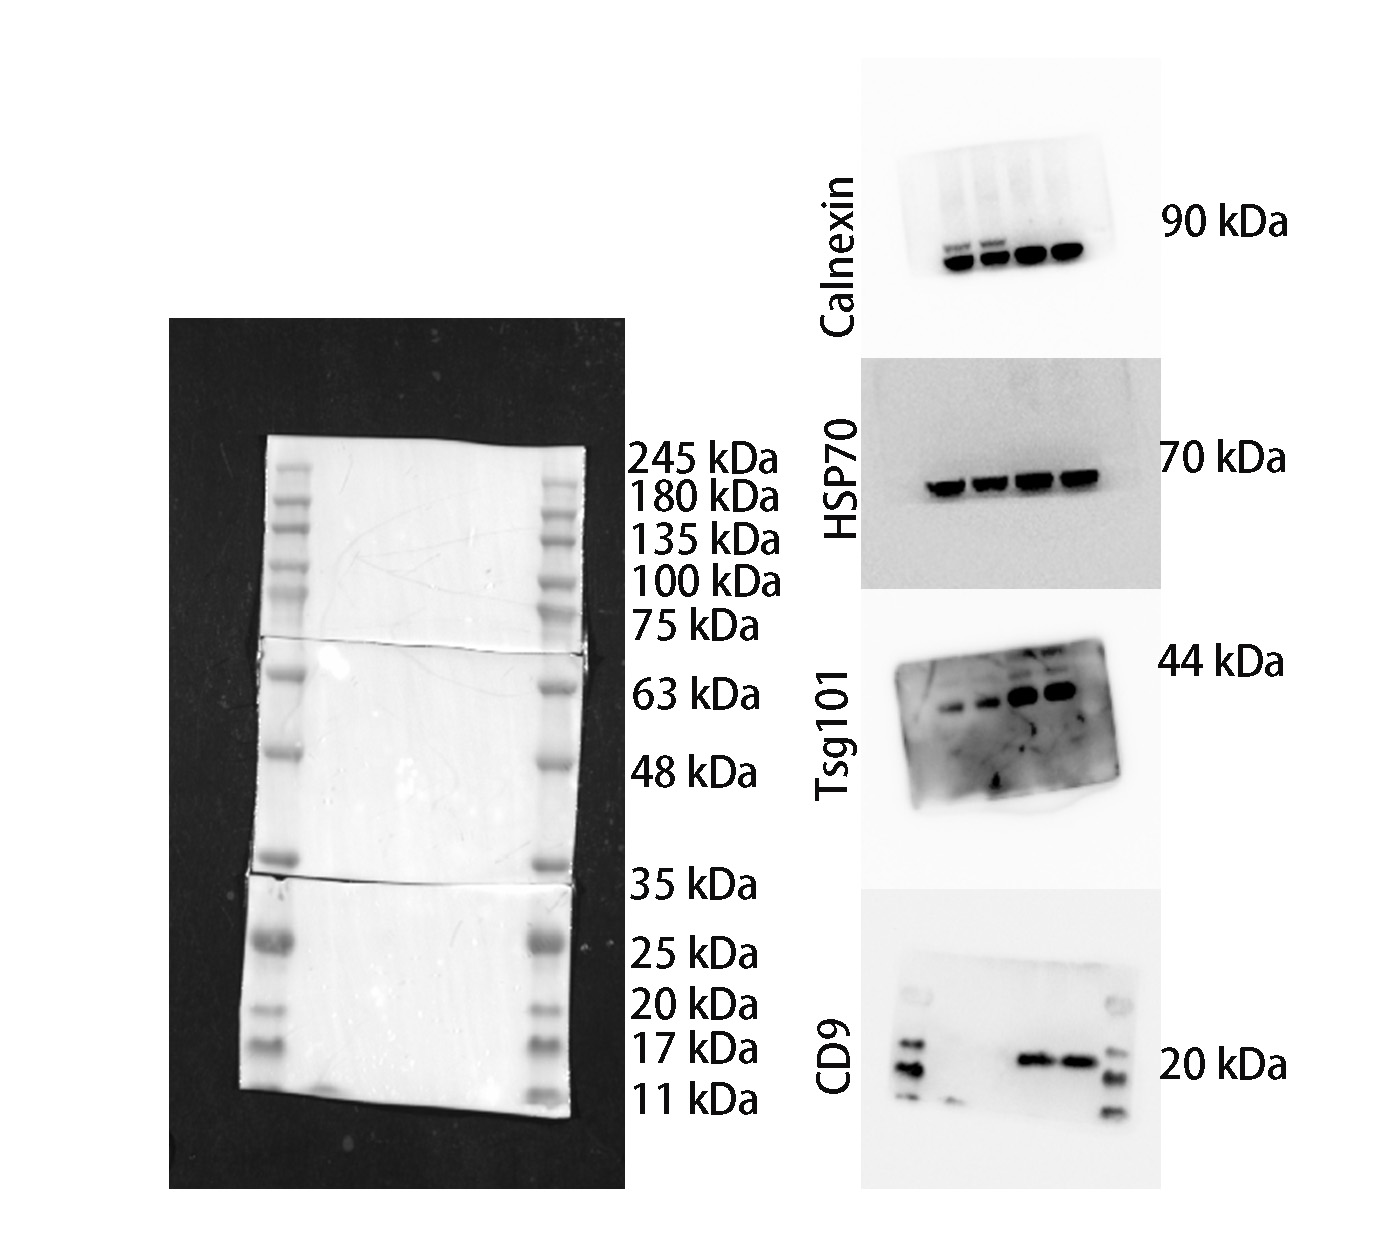


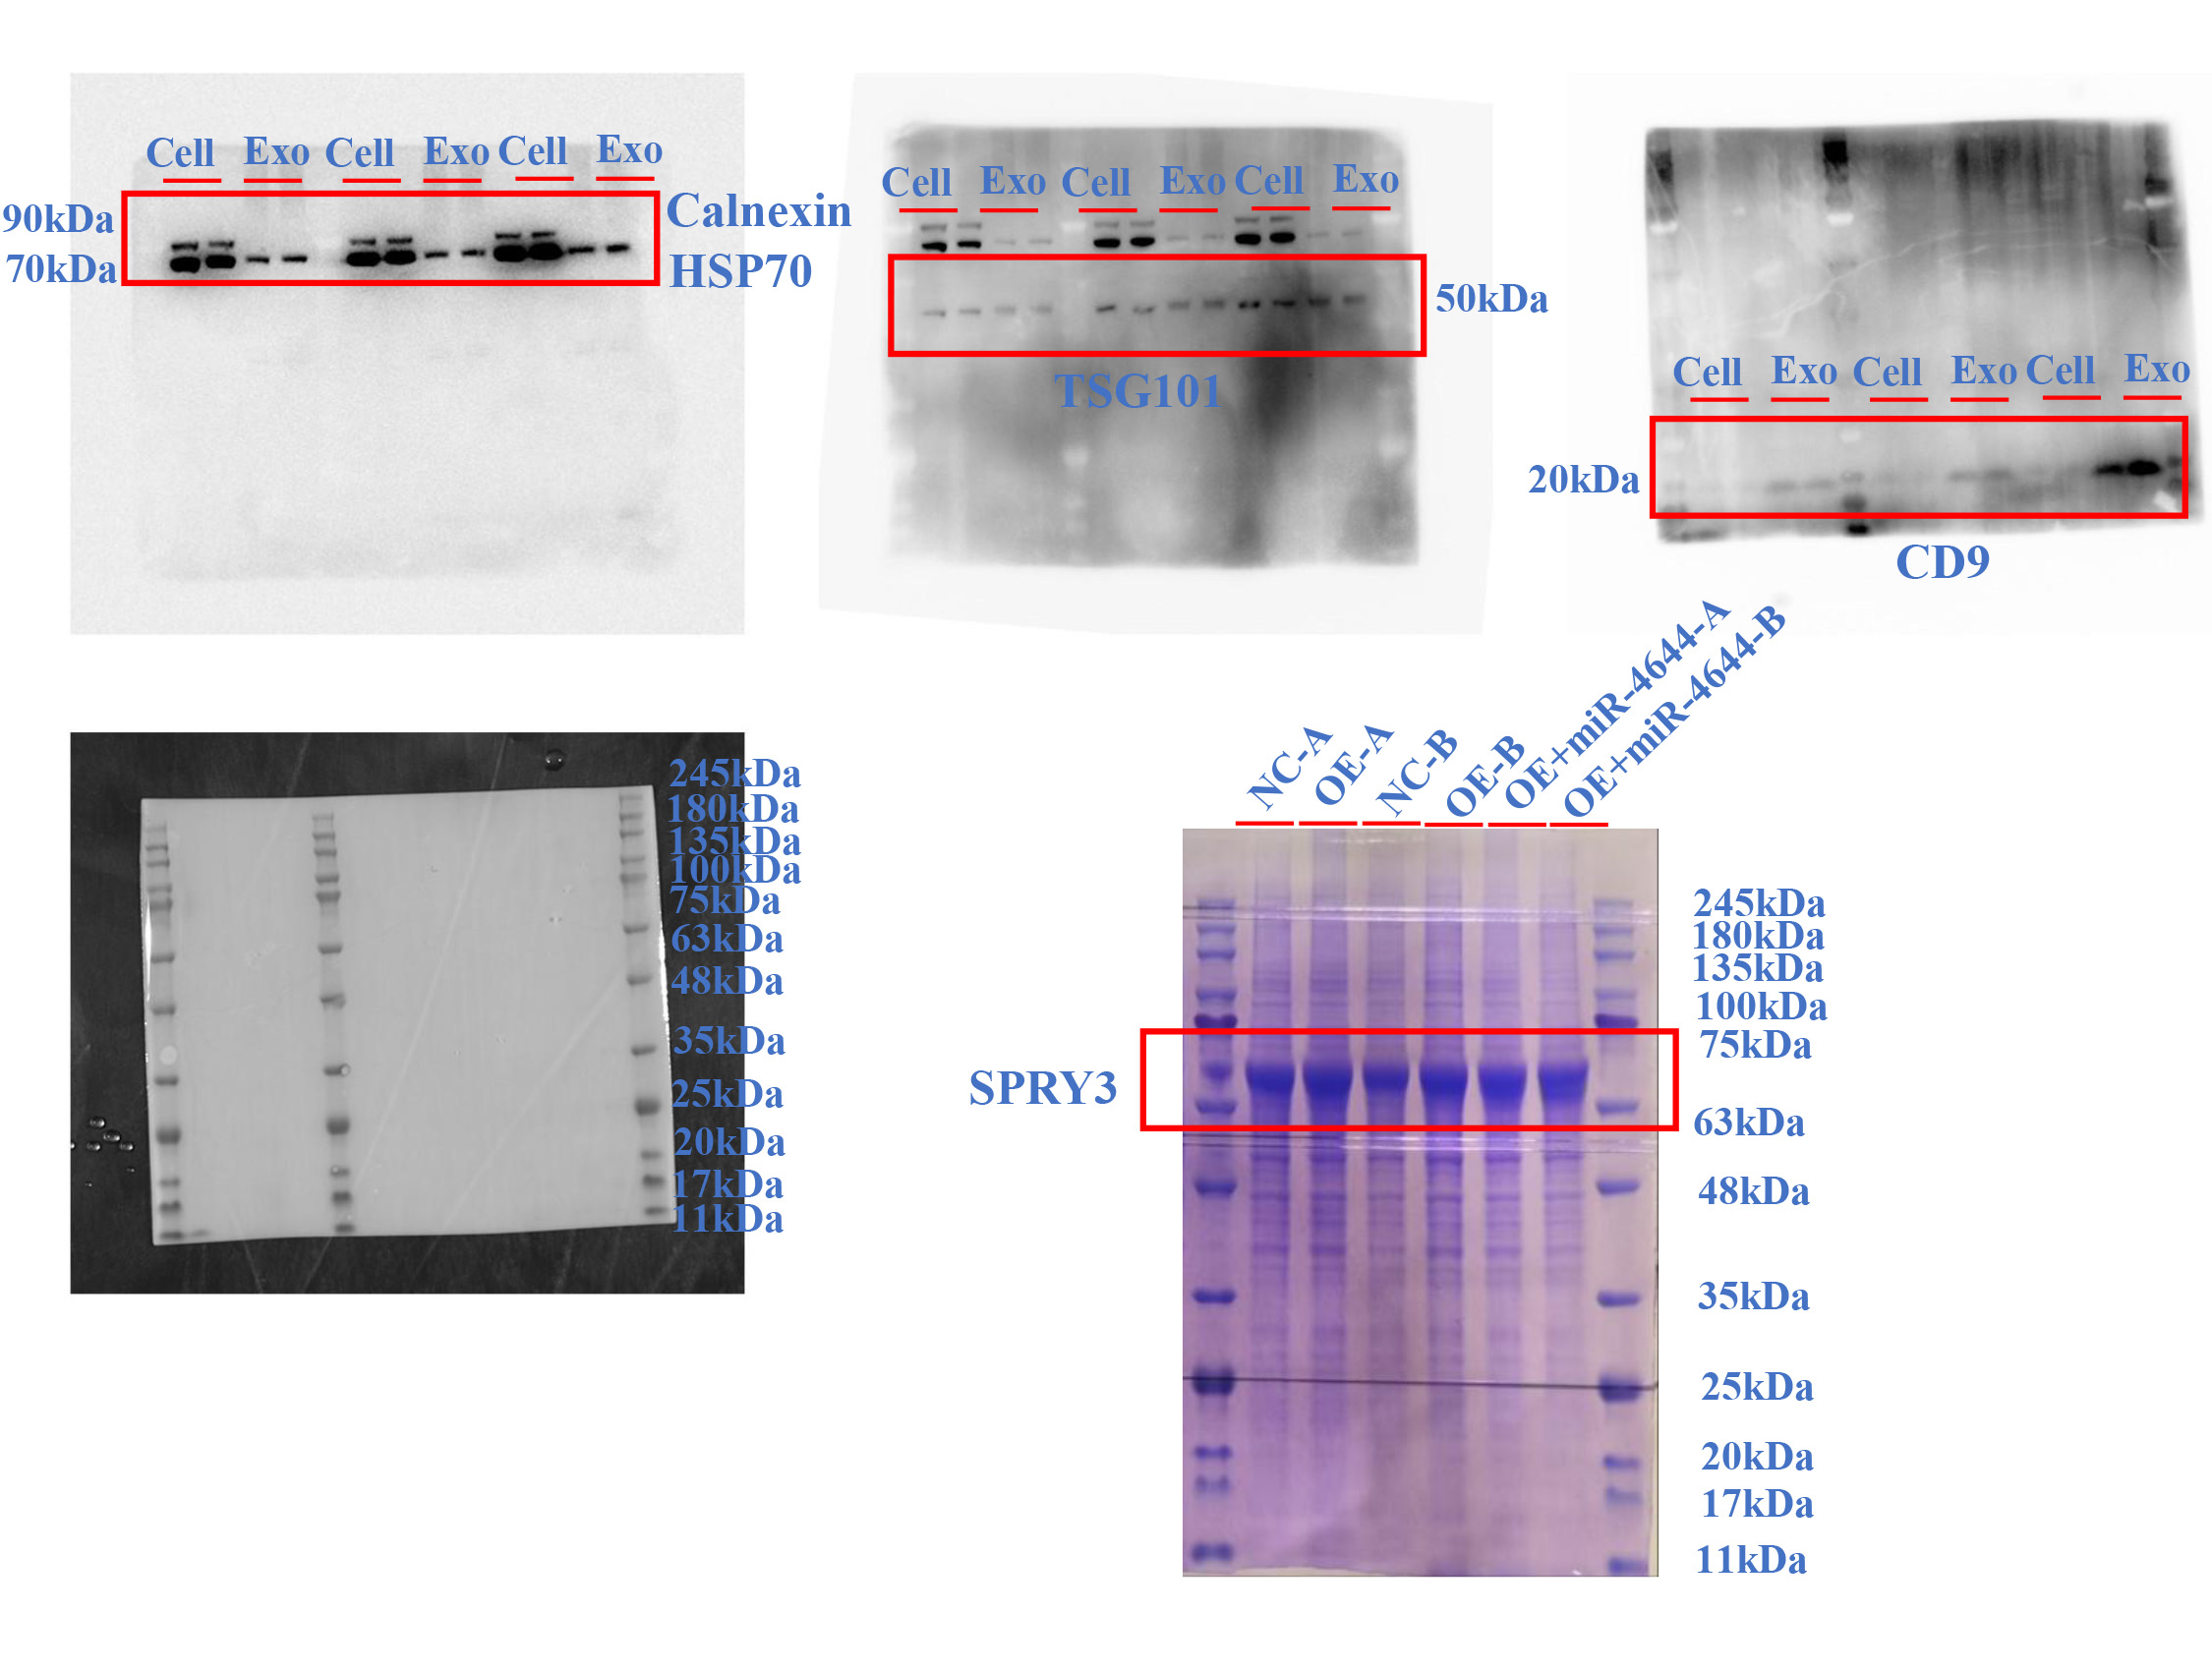

Supplement: Supplementary file 3 [file e18f06a837a250a34ead9106.docx]
